# Supplementary material for: Hepatic Monoacylglycerol O-acyltransferase 1 as a Promising Therapeutic Target for Steatosis, Obesity, and Type 2 Diabetes
Source: PubMed Central journal article supplement — Mol Ther Nucleic Acids. 2014 Mar 18;3(3):e154–. doi: 10.1038/mtna.2014.4 (PMC4027984; doi:10.1038/mtna.2014.4), 2014-03-18
Supplement: mtna20144x1.pdf [file mtna20144x1.pdf]

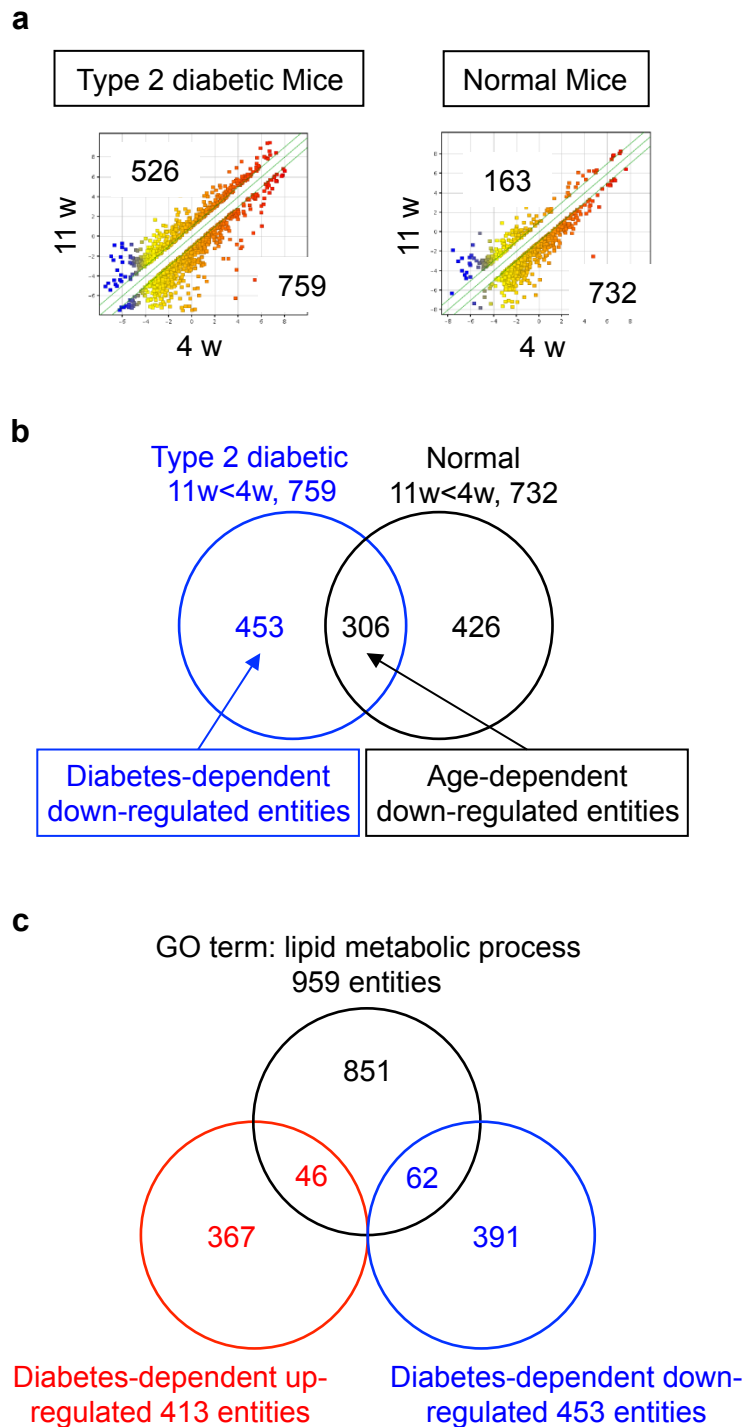

**Figure S1. Microarray data analyses for the extraction of potential candidate genes.**

(a) Scatter plot of differentially expressed genes between type2 diabetic and normal mice. Among the 41174 entities present on the Whole Mouse Genome microarray (Agilent), 1285 (526 and 759 were up- or down-regulated, respectively) were considered to be diabetes-dependent and age-dependent entities in diabetic mice, while 895 (163 and 732 were up- or down-regulated, respectively) were considered to be age-dependent in normal mice. (b) Of the 759 entities that were down-regulated in 11w compared to 4w KKAy mice, 453 and 306 were determined to be diabetes-dependent, and age-dependent entities, respectively. (c) Ven diagram for selection of entities annotated with the GO term lipid metabolic process. 46 and 62 were determined to be diabetes-dependent up- and down-regulated entities those were annotated with lipid metabolic process.

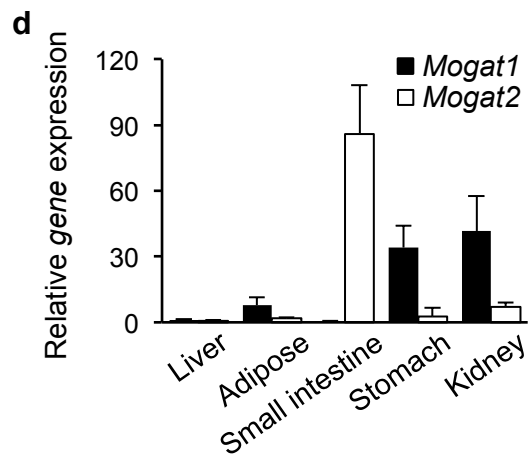

**Figure S2. Expression of *Mogat1* or *Mogat2* mRNA in several tissues of pre-diabetic KKAY mice.**

The expression of *Mogat1* mRNA in liver was analyzed by quantitative RT-PCR. Means  $\pm$  SD are shown (n=5).

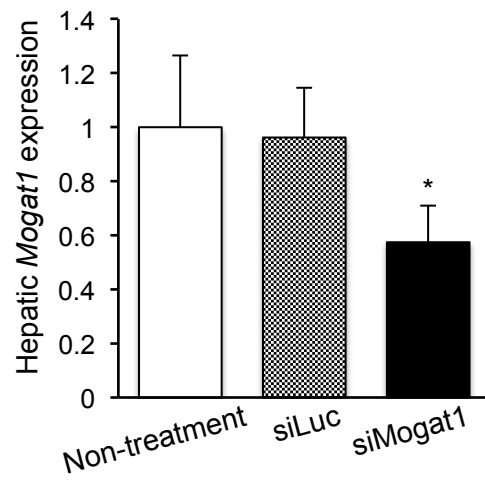

**Figure S3. *in vivo* silencing of hepatic *Mogat1* expression via a systemic siRNA delivery system.**

*Mogat1* mRNA levels in the liver at 12 days after the intravenous injection of nanoparticles loaded with siMogat1 or siLuc (n=5) were analyzed by a quantitative RT-PCR. The expression levels in non-treated mice (n=5) were also assessed. Data represent mean ± SD. \*P<0.05, vs non-treatment control (One-way ANOVA followed by Dunnett's test).

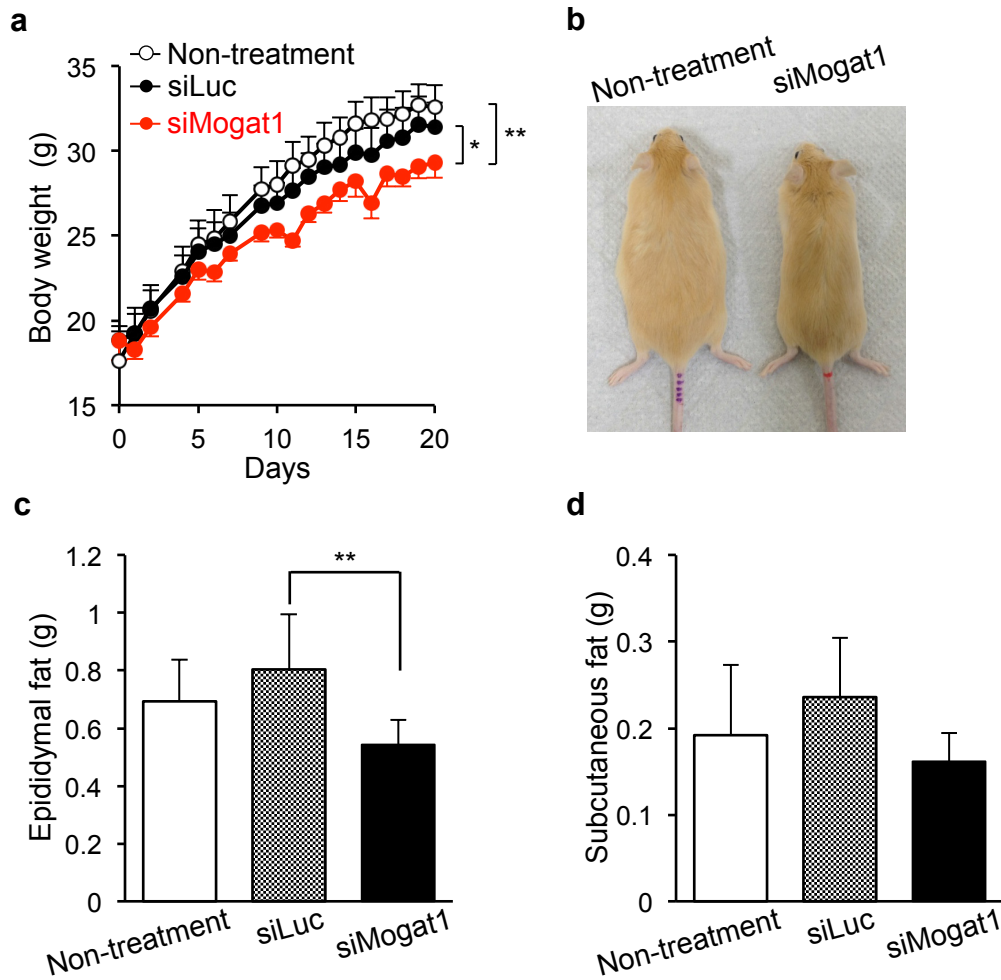

**Figure S4. Changes in body weight after siMogat1 treatment.**

(a) Monitoring of body weight. 4-5 week old KKAY mice were treated with siMogat1 or siLuc loaded nanoparticles every 5 days (2 mg/kg each). (b) Representative image picture of KKAY mouse at Day 20. (c) Epididymal and (d) subcutaneous fat amount at Day 20. Means  $\pm$  SD are shown (n=5-6). \*P<0.05, \*\*P<0.01 (One-way ANOVA followed by Tukey-Kramer's HSD test).

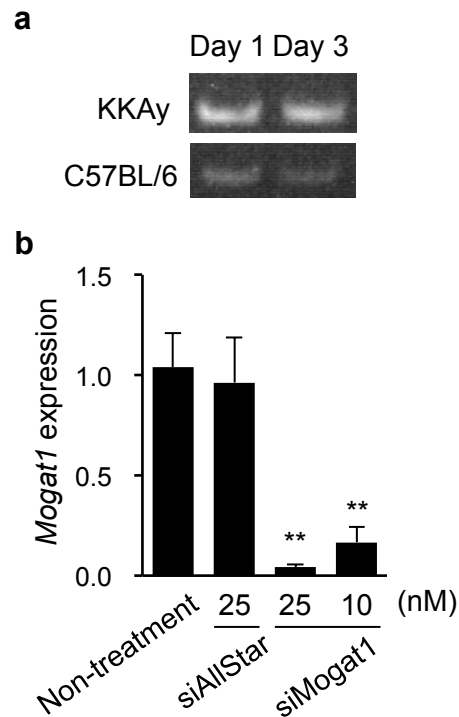

**Figure S5. siRNA transfection study of mouse primary hepatocytes.**

(a) *Mogat1* expression in primary hepatocytes of 9-week old KKAY and C57BL/6J mouse. *Mogat1* expression was evaluated at Day 1 and Day 3 after cell seeding. The PCR products of *Mogat1* were subjected to 10% native gel electrophoresis and visualized by EtBr staining. (b) Knockdown effect of siMogat1 in primary hepatocytes. Isolated hepatocytes from 9-week old KKAY were transfected with the indicated concentrations of siRNA by using a commercially available HiPerFect transfection reagent (QIAGEN). *Mogat1* mRNA levels normalized to *Actb* mRNA measured 48 hours after siRNA transfection (n = 3). Means  $\pm$  SD are shown for all panels. \*\*P<0.01 vs. non-treatment (One-way ANOVA followed by a Dunnett's test).

**Table S1. Gene Ontology analysis of 413 entities that were up-regulated in diabetic mice**

| GO category        | GO terms                                                                                                                                                                                                                                                                                                                                                                                                                                                                 |
|--------------------|--------------------------------------------------------------------------------------------------------------------------------------------------------------------------------------------------------------------------------------------------------------------------------------------------------------------------------------------------------------------------------------------------------------------------------------------------------------------------|
| Biological Process | lipid biosynthetic process<br>lipid metabolic process<br>sterol metabolic process<br>negative regulation of lipid metabolic process<br>response to protein stimulus<br>chromatin assembly<br>nucleosome organization<br>cellular lipid metabolic process<br>response to unfolded protein<br>regulation of developmental process                                                                                                                                          |
| Cellular Component | endoplasmic reticulum<br>nucleosome<br>extracellular region<br>protein-DNA complex<br>chromatin<br>endoplasmic reticulum part<br>mitochondrion<br>insoluble fraction<br>cell fraction<br>axon part                                                                                                                                                                                                                                                                       |
| Molecular Function | oxidoreductase activity, acting on the CH-OH group of donors, NAD or NADP as acceptor<br>steroid dehydrogenase activity, acting on the CH-OH group of donors, NAD or NADP as acceptor<br>hydro-lyase activity<br>carboxy-lyase activity<br>pyridoxal phosphate binding<br>vitamin B6 binding<br>FAD binding<br>NAD or NADH binding<br>transferase activity, transferring acyl groups other than amino-acyl groups<br>secondary active transmembrane transporter activity |

Gene Ontology (GO) analysis of the diabetes-dependent up-regulated 413 entities was carried out using the Database for Annotation, Visualization and Integrated Discovery (DAVID, <http://david.abcc.ncifcrf.gov>). The top 10 functionally enriched GO terms ranked by p-value for GOTERM\_BP\_3, GOTERM\_CC\_3 and GOTERM\_MF\_3 were shown.

**Table S2. Gene Ontology analysis of 453 entities that were down-regulated in diabetic mice**

| GO category        | GO terms                                  |
|--------------------|-------------------------------------------|
| Biological Process | lipid metabolic process                   |
|                    | oxoacid metabolic process                 |
|                    | organic acid metabolic process            |
|                    | cellular ketone metabolic process         |
|                    | regulation of catalytic activity          |
|                    | regulation of transferase activity        |
|                    | positive regulation of catalytic activity |
|                    | positive regulation of molecular function |
|                    | steroid metabolic process                 |
|                    | cellular lipid metabolic process          |
| Cellular Component | vesicular fraction                        |
|                    | microsome                                 |
|                    | cell fraction                             |
|                    | insoluble fraction                        |
|                    | membrane fraction                         |
|                    | plasma membrane                           |
|                    | extracellular region                      |
|                    | cytosol                                   |
|                    | extracellular region part                 |
|                    | extrinsic to membrane                     |
| Molecular Function | phosphoric diester hydrolase activity     |
|                    | aryl sulfotransferase activity            |
|                    | iron ion binding                          |
|                    | kinase regulator activity                 |
|                    | carboxylesterase activity                 |
|                    | growth factor activity                    |
|                    | heme binding                              |
|                    | lipase activity                           |
|                    | tetrapyrrole binding                      |
|                    | protein kinase regulator activity         |

Gene Ontology (GO) analysis of the diabetes-dependent down-regulated 453 entities was carried out using DAVID. The top 10 functionally enriched GO terms ranked by p-value for GOTERM\_BP\_3, GOTERM\_CC\_3 and GOTERM\_MF\_3 were shown.

**Table S3. 46 entities with lipid metabolic process out of the diabetes-dependent up-regulated entities**

| Probe Name   | Gene Symbol    | Description                                                                    | Fold Change        |                    |                  |
|--------------|----------------|--------------------------------------------------------------------------------|--------------------|--------------------|------------------|
|              |                |                                                                                | 11w KKAy / 11w C57 | 11w KKAy / 4w KKAy | 11w C57 / 4w C57 |
| A_52_P364021 | <i>Mogat1</i>  | monoacylglycerol O-acyltransferase 1                                           | 19.4               | 4.3                | 1.6              |
| A_51_P352005 | <i>Hsd3b4</i>  | hydroxy-delta-5-steroid dehydrogenase, 3 beta- and steroid delta-isomerase 4   | 17.7               | 36.7               | 1.3              |
| A_51_P496162 | <i>Hsd3b5</i>  | hydroxy-delta-5-steroid dehydrogenase, 3 beta- and steroid delta-isomerase 5   | 16.5               | 37.5               | 1.3              |
| A_51_P199168 | <i>Cidea</i>   | cell death-inducing DNA fragmentation factor, alpha subunit-like effector A    | 15.2               | 10.9               | 1.1              |
| A_51_P112151 | <i>Mogat1</i>  | monoacylglycerol O-acyltransferase 1                                           | 14.9               | 4.3                | 1.3              |
| A_52_P64376  | <i>Mogat1</i>  | monoacylglycerol O-acyltransferase 1                                           | 12.2               | 4.4                | 1.3              |
| A_51_P457664 | <i>Cyp46a1</i> | cytochrome P450, family 46, subfamily a, polypeptide 1                         | 9.8                | 3.5                | 1.5              |
| A_51_P475523 | <i>Brcal</i>   | breast cancer 1                                                                | 6.1                | 2.8                | 0.7              |
| A_51_P375138 | <i>Cd36</i>    | CD36 antigen                                                                   | 3.4                | 2.8                | 0.8              |
| A_51_P226567 | <i>Hsd3b2</i>  | hydroxy-delta-5-steroid dehydrogenase, 3 beta- and steroid delta-isomerase 2   | 3.4                | 2.0                | 0.7              |
| A_51_P375146 | <i>Cd36</i>    | CD36 antigen                                                                   | 3.3                | 3.0                | 0.9              |
| A_52_P67637  | <i>Sc5d</i>    | sterol-C5-desaturase (fungal ERG3, delta-5-desaturase) homolog (S. cerevisiae) | 3.3                | 2.1                | 1.7              |
| A_51_P470935 | <i>Bdh2</i>    | 3-hydroxybutyrate dehydrogenase, type 2                                        | 3.0                | 3.7                | 1.2              |
| A_52_P407786 | <i>Sptlc2</i>  | serine palmitoyltransferase, long chain base subunit 2                         | 2.9                | 3.3                | 1.3              |
| A_52_P682382 | <i>Scd1</i>    | stearoyl-Coenzyme A desaturase 1                                               | 2.8                | 5.1                | 1.0              |
| A_52_P195809 | <i>Bdh2</i>    | 3-hydroxybutyrate dehydrogenase, type 2                                        | 2.8                | 3.8                | 1.2              |
| A_51_P382764 | <i>Akr1c20</i> | aldo-keto reductase family 1, member C20                                       | 2.8                | 2.5                | 0.8              |
| A_51_P290207 | <i>Insig1</i>  | insulin induced gene 1                                                         | 2.7                | 2.4                | 1.3              |
| A_51_P189082 | <i>Akr1c6</i>  | aldo-keto reductase family 1, member C6                                        | 2.7                | 2.3                | 0.8              |
| A_51_P189442 | <i>Adh4</i>    | alcohol dehydrogenase 4 (class II), pi polypeptide                             | 2.6                | 3.9                | 1.1              |
| A_51_P318262 | <i>Hao1</i>    | hydroxyacid oxidase 1, liver                                                   | 2.6                | 2.3                | 0.7              |
| A_51_P355943 | <i>Mvd</i>     | mevalonate (diphospho) decarboxylase                                           | 2.6                | 2.1                | 1.3              |



**Table S3. Continued**

| Probe Name   | Gene Symbol     | Description                                                       | Fold Change           |                       |                     |
|--------------|-----------------|-------------------------------------------------------------------|-----------------------|-----------------------|---------------------|
|              |                 |                                                                   | 11w KKAy<br>/ 11w C57 | 11w KKAy<br>/ 4w KKAy | 11w C57 /<br>4w C57 |
| A_51_P499854 | <i>Ghr</i>      | growth hormone receptor                                           | 2.4                   | 2.4                   | 1.1                 |
| A_52_P644613 | <i>Sult1b1</i>  | sulfotransferase family 1B, member 1                              | 2.3                   | 2.9                   | 1.0                 |
| A_51_P206551 | <i>Sult1b1</i>  | sulfotransferase family 1B, member 1                              | 2.2                   | 2.3                   | 0.9                 |
| A_51_P340226 | <i>Sh3yl1</i>   | Sh3 domain YSC-like 1                                             | 2.2                   | 2.2                   | 1.1                 |
| A_51_P458839 | <i>Piga</i>     | phosphatidylinositol glycan anchor biosynthesis, class A          | 2.1                   | 2.1                   | 1.1                 |
| A_52_P562676 | <i>Sult4a1</i>  | sulfotransferase family 4A, member 1                              | 1.9                   | 2.1                   | 1.2                 |
| A_52_P680941 | <i>Ghr</i>      | growth hormone receptor                                           | 1.9                   | 2.3                   | 1.0                 |
| A_52_P391095 | <i>Crem</i>     | cAMP responsive element modulator                                 | 1.9                   | 2.6                   | 1.1                 |
| A_51_P379798 | <i>Fdps</i>     | farnesyl diphosphate synthetase                                   | 1.8                   | 2.7                   | 1.1                 |
| A_52_P391098 | <i>Crem</i>     | cAMP responsive element modulator                                 | 1.8                   | 2.5                   | 1.1                 |
| A_51_P267024 | <i>Pafah1b3</i> | platelet-activating factor acetylhydrolase, isoform 1b, subunit 3 | 1.8                   | 2.0                   | 1.0                 |
| A_52_P391103 | <i>Crem</i>     | cAMP responsive element modulator                                 | 1.8                   | 2.6                   | 1.1                 |
| A_52_P680935 | <i>Ghr</i>      | growth hormone receptor                                           | 1.8                   | 2.3                   | 1.1                 |
| A_51_P240857 | <i>Chpt1</i>    | choline phosphotransferase 1                                      | 1.7                   | 2.5                   | 1.8                 |
| A_52_P460957 | <i>Crem</i>     | cAMP responsive element modulator                                 | 1.7                   | 2.4                   | 1.0                 |
| A_51_P423976 | <i>Crem</i>     | cAMP responsive element modulator                                 | 1.7                   | 3.3                   | 1.3                 |
| A_52_P655803 | <i>Chpt1</i>    | choline phosphotransferase 1                                      | 1.6                   | 2.2                   | 1.7                 |
| A_52_P164161 | <i>Cyp51</i>    | cytochrome P450, family 51                                        | 1.6                   | 3.1                   | 1.4                 |
| A_51_P329711 | <i>Idi1</i>     | isopentenyl-diphosphate delta isomerase                           | 1.5                   | 3.0                   | 1.3                 |
| A_52_P441634 | <i>Idi1</i>     | isopentenyl-diphosphate delta isomerase                           | 1.4                   | 2.1                   | 1.1                 |
| A_52_P231292 | <i>Cyp2j6</i>   | cytochrome P450, family 2, subfamily j, polypeptide 6             | 1.4                   | 2.1                   | 1.3                 |
| A_51_P187346 | <i>Sgms2</i>    | sphingomyelin synthase 2                                          | 1.4                   | 2.2                   | 1.4                 |

**Table S3. Continued**

| Probe Name   | Gene Symbol   | Description                   | Fold Change           |                       |                     |
|--------------|---------------|-------------------------------|-----------------------|-----------------------|---------------------|
|              |               |                               | 11w KKAy<br>/ 11w C57 | 11w KKAy<br>/ 4w KKAy | 11w C57 /<br>4w C57 |
| A_51_P209372 | <i>Sc4mol</i> | sterol-C4-methyl oxidase-like | 1.1                   | 2.4                   | 1.4                 |
| A_51_P229599 | <i>Etnk1</i>  | ethanolamine kinase 1         | 1.0                   | 2.0                   | 1.6                 |

**Table S4. 62 entities with lipid metabolic process out of the diabetes-dependent down-regulated entities**

| Probe Name   | Gene Symbol    | Description                                                          | Fold Change        |                    |                  |
|--------------|----------------|----------------------------------------------------------------------|--------------------|--------------------|------------------|
|              |                |                                                                      | 11w KKAy / 11w C57 | 11w KKAy / 4w KKAy | 11w C57 / 4w C57 |
| A_52_P483101 | <i>Lpin1</i>   | lipin 1                                                              | 0.01               | 0.13               | 0.58             |
| A_52_P483104 | <i>Lpin1</i>   | lipin 1                                                              | 0.02               | 0.14               | 0.59             |
| A_52_P483105 | <i>Lpin1</i>   | lipin 1                                                              | 0.02               | 0.15               | 0.59             |
| A_52_P557265 | <i>Cyp39a1</i> | cytochrome P450, family 39, subfamily a, polypeptide 1               | 0.03               | 0.02               | 0.73             |
| A_51_P515446 | <i>Cyp39a1</i> | cytochrome P450, family 39, subfamily a, polypeptide 1               | 0.03               | 0.02               | 0.69             |
| A_51_P394984 | <i>Lpin1</i>   | lipin 1                                                              | 0.04               | 0.15               | 0.60             |
| A_51_P355996 | <i>Acot5</i>   | acyl-CoA thioesterase 5                                              | 0.04               | 0.06               | 2.03             |
| A_52_P472486 | <i>Cyp2b10</i> | cytochrome P450, family 2, subfamily b, polypeptide 10               | 0.08               | 0.04               | 1.02             |
| A_51_P182362 | <i>Cyp2b10</i> | cytochrome P450, family 2, subfamily b, polypeptide 10               | 0.08               | 0.04               | 0.93             |
| A_51_P493649 | <i>Sult1e1</i> | sulfotransferase family 1E, member 1                                 | 0.11               | 0.11               | 1.36             |
| A_52_P478025 | <i>Smpd3</i>   | sphingomyelin phosphodiesterase 3, neutral                           | 0.13               | 0.24               | 1.38             |
| A_51_P383459 | <i>Smpd3</i>   | sphingomyelin phosphodiesterase 3, neutral                           | 0.17               | 0.28               | 0.97             |
| A_52_P84027  | <i>Cyp7a1</i>  | cytochrome P450, family 7, subfamily a, polypeptide 1                | 0.18               | 0.23               | 0.86             |
| A_52_P625508 | <i>Cpt1b</i>   | carnitine palmitoyltransferase 1b, muscle                            | 0.19               | 0.19               | 1.31             |
| A_51_P462918 | <i>Ehhadh</i>  | enoyl-Coenzyme A, hydratase/3-hydroxyacyl Coenzyme A dehydrogenase   | 0.21               | 0.33               | 1.30             |
| A_51_P290981 | <i>Cyp7a1</i>  | cytochrome P450, family 7, subfamily a, polypeptide 1                | 0.21               | 0.31               | 0.96             |
| A_52_P199905 | <i>Slc27a1</i> | solute carrier family 27 (fatty acid transporter), member 1          | 0.24               | 0.38               | 1.26             |
| A_52_P371922 | <i>Dgkh</i>    | diacylglycerol kinase, eta                                           | 0.25               | 0.35               | 0.59             |
| A_52_P384069 | <i>Gpcpd1</i>  | glycerophosphocholine phosphodiesterase GDE1 homolog (S. cerevisiae) | 0.27               | 0.30               | 0.74             |
| A_51_P232913 | <i>Cpt1b</i>   | carnitine palmitoyltransferase 1b, muscle                            | 0.28               | 0.24               | 1.45             |
| A_51_P464791 | <i>Gpcpd1</i>  | glycerophosphocholine phosphodiesterase GDE1 homolog (S. cerevisiae) | 0.32               | 0.31               | 0.72             |
| A_52_P470017 | <i>Gpcpd1</i>  | glycerophosphocholine phosphodiesterase GDE1 homolog (S. cerevisiae) | 0.32               | 0.32               | 0.68             |

**Table S4. Continued**

| Probe Name   | Gene Symbol    | Description                                                                   | Fold Change           |                       |                     |
|--------------|----------------|-------------------------------------------------------------------------------|-----------------------|-----------------------|---------------------|
|              |                |                                                                               | 11w KKAy<br>/ 11w C57 | 11w KKAy<br>/ 4w KKAy | 11w C57 /<br>4w C57 |
| A_52_P470017 | <i>Gpcpd1</i>  | glycerophosphocholine phosphodiesterase GDE1 homolog ( <i>S. cerevisiae</i> ) | 0.32                  | 0.32                  | 0.68                |
| A_52_P113250 | <i>Insig2</i>  | insulin induced gene 2                                                        | 0.33                  | 0.44                  | 1.09                |
| A_51_P201709 | <i>Ggt5</i>    | gamma-glutamyltransferase 5                                                   | 0.34                  | 0.38                  | 1.00                |
| A_52_P537545 | <i>Smpd3</i>   | sphingomyelin phosphodiesterase 3, neutral                                    | 0.35                  | 0.39                  | 0.94                |
| A_51_P327491 | <i>Apoa4</i>   | apolipoprotein A-IV                                                           | 0.36                  | 0.24                  | 1.88                |
| A_52_P681771 | <i>Pnpla2</i>  | patatin-like phospholipase domain containing 2                                | 0.37                  | 0.33                  | 0.83                |
| A_51_P197213 | <i>Pnpla2</i>  | patatin-like phospholipase domain containing 2                                | 0.37                  | 0.36                  | 0.97                |
| A_51_P451574 | <i>Acot1</i>   | acyl-CoA thioesterase 1                                                       | 0.38                  | 0.49                  | 1.35                |
| A_52_P525183 | <i>Acot2</i>   | acyl-CoA thioesterase 2                                                       | 0.38                  | 0.25                  | 0.88                |
| A_51_P439452 | <i>Insig2</i>  | insulin induced gene 2                                                        | 0.39                  | 0.50                  | 1.26                |
| A_52_P6588   | <i>Cyp4a10</i> | cytochrome P450, family 4, subfamily a, polypeptide 10                        | 0.39                  | 0.35                  | 1.02                |
| A_52_P407755 | <i>Gpcpd1</i>  | glycerophosphocholine phosphodiesterase GDE1 homolog ( <i>S. cerevisiae</i> ) | 0.40                  | 0.33                  | 0.51                |
| A_52_P219753 | <i>Cpt1a</i>   | carnitine palmitoyltransferase 1a, liver                                      | 0.41                  | 0.46                  | 0.87                |
| A_51_P370438 | <i>Lpin2</i>   | lipin 2                                                                       | 0.42                  | 0.35                  | 0.93                |
| A_51_P299287 | <i>Impa2</i>   | inositol (myo)-1(or 4)-monophosphatase 2                                      | 0.44                  | 0.37                  | 1.55                |
| A_51_P137029 | <i>Plce1</i>   | phospholipase C, epsilon 1                                                    | 0.45                  | 0.38                  | 1.09                |
| A_52_P430523 | <i>Cln8</i>    | ceroid-lipofuscinosis, neuronal 8                                             | 0.46                  | 0.49                  | 1.05                |
| A_52_P340136 | <i>Cyp4a10</i> | cytochrome P450, family 4, subfamily a, polypeptide 10                        | 0.48                  | 0.49                  | 1.17                |
| A_51_P381618 | <i>Pla1a</i>   | phospholipase A1 member A                                                     | 0.48                  | 0.47                  | 0.73                |
| A_52_P257774 | <i>Cyp4a10</i> | cytochrome P450, family 4, subfamily a, polypeptide 10                        | 0.48                  | 0.49                  | 1.17                |
| A_51_P481721 | <i>Sult1d1</i> | sulfotransferase family 1D, member 1                                          | 0.49                  | 0.41                  | 1.11                |
| A_51_P349341 | <i>Npc1</i>    | Niemann Pick type C1                                                          | 0.50                  | 0.46                  | 0.94                |

**Table S4. Continued**

| Probe Name   | Gene Symbol     | Description                                                            | Fold Change           |                       |                     |
|--------------|-----------------|------------------------------------------------------------------------|-----------------------|-----------------------|---------------------|
|              |                 |                                                                        | 11w KKAy<br>/ 11w C57 | 11w KKAy<br>/ 4w KKAy | 11w C57 /<br>4w C57 |
| A_51_P385598 | <i>Slc37a4</i>  | solute carrier family 37 (glucose-6-phosphate transporter), member 4   | 0.52                  | 0.46                  | 1.24                |
| A_51_P192523 | <i>Fgf23</i>    | fibroblast growth factor 23                                            | 0.52                  | 0.38                  | 1.00                |
| A_52_P431159 | <i>Il1rn</i>    | interleukin 1 receptor antagonist                                      | 0.53                  | 0.23                  | 0.67                |
| A_51_P345649 | <i>Pdgfra</i>   | platelet derived growth factor receptor, alpha polypeptide             | 0.58                  | 0.38                  | 1.01                |
| A_51_P132625 | <i>Hsd17b11</i> | hydroxysteroid (17-beta) dehydrogenase 11                              | 0.59                  | 0.39                  | 0.72                |
| A_51_P321341 | <i>Sult1a1</i>  | sulfotransferase family 1A, phenol-preferring, member 1                | 0.60                  | 0.50                  | 0.90                |
| A_51_P155755 | <i>Pld6</i>     | phospholipase D family, member 6                                       | 0.60                  | 0.37                  | 0.94                |
| A_52_P402885 | <i>Inpp1</i>    | inositol polyphosphate-1-phosphatase                                   | 0.61                  | 0.42                  | 0.87                |
| A_51_P422457 | <i>Plcl1</i>    | phospholipase C-like 1                                                 | 0.63                  | 0.42                  | 0.77                |
| A_52_P564544 | <i>Fabp4</i>    | fatty acid binding protein 4, adipocyte                                | 0.64                  | 0.41                  | 0.67                |
| A_51_P177762 | <i>Rdh9</i>     | retinol dehydrogenase 9                                                | 0.73                  | 0.46                  | 0.61                |
| A_51_P336833 | <i>Fabp4</i>    | fatty acid binding protein 4, adipocyte                                | 0.75                  | 0.47                  | 0.62                |
| A_51_P336830 | <i>Fabp4</i>    | fatty acid binding protein 4, adipocyte                                | 0.78                  | 0.50                  | 0.64                |
| A_51_P374137 | <i>Bcmo1</i>    | beta-carotene 15,15'-monooxygenase                                     | 0.83                  | 0.28                  | 0.57                |
| A_52_P564413 | <i>Pik3c2g</i>  | phosphatidylinositol 3-kinase, C2 domain containing, gamma polypeptide | 0.88                  | 0.33                  | 0.87                |
| A_52_P87843  | <i>Aldh1a3</i>  | aldehyde dehydrogenase family 1, subfamily A3                          | 0.93                  | 0.43                  | 0.61                |
| A_51_P500044 | <i>Vldlr</i>    | very low density lipoprotein receptor                                  | 1.06                  | 0.29                  | 0.54                |
| A_51_P331737 | <i>Acsm2</i>    | acyl-CoA synthetase medium-chain family member 2                       | 1.89                  | 0.25                  | 0.89                |
| A_52_P500856 | <i>Acsm2</i>    | acyl-CoA synthetase medium-chain family member 2                       | 2.22                  | 0.26                  | 0.77                |

**Table S5. Gene Ontology analysis of the differentially expressed genes between pre- and post-diabetic mice**

| Entity list          | GO terms                                                                                                                                                                                                                                                                                                                   |
|----------------------|----------------------------------------------------------------------------------------------------------------------------------------------------------------------------------------------------------------------------------------------------------------------------------------------------------------------------|
| KKAy                 | lipid metabolic process                                                                                                                                                                                                                                                                                                    |
| 11w>4w, 526 entities | lipid biosynthetic process<br>sterol metabolic process<br>cellular lipid metabolic process<br>negative regulation of lipid metabolic process<br>organic acid metabolic process<br>response to protein stimulus<br>cellular ketone metabolic process<br>regulation of cell adhesion<br>negative regulation of cell adhesion |
| KKAy                 | M phase of mitotic cell cycle                                                                                                                                                                                                                                                                                              |
| 11w<4w, 759 entities | nuclear division<br>mitosis<br>M phase<br>organelle fission<br>cell cycle process<br>mitotic cell cycle<br>cell cycle phase<br>cell cycle phase<br>lipid metabolic process                                                                                                                                                 |

Gene Ontology (GO) analysis of the up- or down-regulated entities selected by comparison between 4w and 11w KKAy mice without the subtraction of age-dependent genes was carried out using DAVID. The top 10 functionally enriched GO terms ranked by p-value for GOTERM\_BP\_3 were shown.
